# Supplementary material for: Smartphone App–Based Contingency Management and Opioid Use Disorder Treatment Outcomes
Source: PubMed Central journal article supplement (PMC11612830; doi:10.1001/jamanetworkopen.2024.48405), 2024-12-02
Supplement: jamanetwopen-e2448405-s001.pdf [file jamanetwopen-e2448405-s001.pdf]

## Supplemental Online Content

Marino EN, Karns-Wright T, Perez MC, Potter JS. Smartphone app–based contingency management and opioid use disorder treatment outcomes. *JAMA Netw Open*. 2024;7(12):e2448405. doi:10.1001/jamanetworkopen.2024.48405

**eTable.** Sensitivity Analyses With the Entire Sample (N = 3759)

This supplemental material has been provided by the authors to give readers additional information about their work.

**eTable.** Sensitivity Analyses With the Entire Sample (N = 3759)

| <b>Days of Opioid Use at End of Treatment</b> <sup>a</sup> | <b>β estimate [95% Confidence Interval]</b> | <b>p value</b> |
|------------------------------------------------------------|---------------------------------------------|----------------|
| Treatment setting                                          | 1.84 [-0.57, 4.24]                          | .13            |
| <b>MOUD</b>                                                |                                             |                |
| Buprenorphine to Naltrexone                                | 1.35 [-7.09, 9.79]                          | .75            |
| Buprenorphine to Methadone                                 | -2.43 [-6.64, 1.78]                         | .26            |
| Methadone Only                                             | -1.83 [-6.21, 2.55]                         | .41            |
| Treatment group                                            | -3.31 [-4.45, -1.85]                        | < .001         |
| <b>Retention</b> <sup>b</sup>                              |                                             |                |
| Treatment setting                                          | 38.84 [-0.68, 78.36]                        | .054           |
| <b>MOUD</b>                                                |                                             |                |
| Buprenorphine to Naltrexone                                | -87.50 [-206.01, 31.01]                     | .15            |
| Buprenorphine to Methadone                                 | 67.10 [-5.79, 139.99]                       | .07            |
| Methadone Only                                             | 103.08 [29.79, 176.36]                      | .006           |
| Treatment group                                            | 51.64 [33.61, 69.67]                        | < .001         |

<sup>a</sup> Linear regression analysis, <sup>b</sup> cox regression analysis. Reference groups: OBOT (treatment setting), buprenorphine only (MOUD), and MOUD only (treatment group).
