# Supplementary material for: Smartphone App–Based Contingency Management and Opioid Use Disorder Treatment Outcomes
Source: PubMed Central journal article supplement (PMC11612830; doi:10.1001/jamanetworkopen.2024.48405), 2024-12-02
Supplement: jamanetwopen-e2448405-s002.pdf [file jamanetwopen-e2448405-s002.pdf]

## Data Sharing Statement

Marino. Smartphone App–Based Contingency Management and Opioid Use Disorder Treatment Outcomes. *JAMA Netw Open*. Published December 02, 2024.  
doi:10.1001/jamanetworkopen.2024.48405

### Data

**Data available:** No
